# Supplementary material for: Genome-Wide Identification of BTB Domain-Containing Gene Family in Grapevine (Vitis vinifera L.)
Source: MDPI journal article supplement (doi:10.3390/agriculture13020252), 2023-01-20
Supplement: s1 [file s1]

Archive with 4 entries (4 files):
- Figure S1.pdf
- Table S1.xlsx
- Table S2.xlsx
- Table S3.pdf
