# Supplementary material for: Genome-Wide Identification of BTB Domain-Containing Gene Family in Grapevine (Vitis vinifera L.)
Source: MDPI journal article supplement (doi:10.3390/agriculture13020252), 2023-01-20
Supplement: s1 [file s1 › Table S1.xlsx]

## Sheet: Sheet1
Table S1 RNA-seq data collected from NCBI-SRA database
Sr. No.	Species	Tissue	SRA	Condition	Publication
1	Vitis vinifera cv. Thompson seedless	Leaves of 5-month-old potted plants	SRX3140201	36 hours post inoculation (hpi) of Erysiphe necator biological replicate 1	Ectopic expression of Arabidopsis broad-spectrum resistance gene RPW8. 2 improves the resistance to powdery mildew in grapevine (Vitis vinifera). (Hu et al. 2018)
			SRX3140202	36 hpi of Erysiphe necator biological replicate 2
			SRX3140209	36 hpi of Erysiphe necator biological replicate 3
			SRX3140207	Control biological replicate 1
			SRX3140208	Control biological replicate 2
2	Vitis vinifera L.cv.Pinot noir	Leaf discs of glasshouse grown vines	SRX145807	0 hpi of Plasmopara viticola	Genome-wide analysis of the grapevine stilbene synthase multigenic family: genomic organization and expression profiles upon biotic and abiotic stresses. (Vannozzi et al. 2012)
			SRX145812	24 hpi of Plasmopara viticola
			SRX145813	48 hpi of Plasmopara viticola
3	Vitis vinifera cv. Summer black	Leaf	SRX1392667	2-week-old young leaf	Transcriptomic analysis of grapevine (cv. Summer black) leaf, using the illumina platform. (Pervaiz et al. 2016)
			SRX1392668	5-week-old medium size leaf
			SRX1392669	7-week-old large size leaf
			SRX1392670	10-week-old mature leaf
4	Vitis vinifera L.cv. Thompson seedless	Infloroscence	SRX886605	3 days after 100% capfall Biological replicate 1	Shared and divergent pathways for flower abscission are triggered by gibberellic acid and carbon starvation in seedless Vitis vinifera (Domingos et al. 2016)
			SRX964399	3 days after 100% capfall Biological replicate 2
			SRX964402	3 days after 100% capfall Biological replicate 3
			SRX964421	5 days after 100% capfall Biological replicate 1
			SRX964430	5 days after 100% capfall Biological replicate 2
			SRX966723	5 days after 100% capfall Biological replicate 3
			SRX966735	7 days after 100% capfall Biological replicate 1
			SRX966740	7 days after 100% capfall Biological replicate 2
			SRX966742	7 days after 100% capfall Biological replicate 3
5	Vitis vinifera L. Muscat blanc	Deseeded berries	SRX1113882	berries beginning to color and enlarge (E-L stage 35)	Using the combined analysis of transcripts and metabolites to propose key genes for differential terpene accumulation across two regions. (Wen et al. 2015)
			SRX1113876	berries with intermediate Brix values (E-L stage 36)
			SRX1113877	ripe/harvest stage (E-L stage 38)
6	Vitis vinifera L.cv.Pinot noir	Leaves of 9-week-old potted plants	SRX3680591	0 days after water withhelding Biological replicate 1	The grapevine kinome: annotation, classification and expression patterns in developmental processes and stress responses. (Zhu et al. 2018)
			SRX3680594	0 days after water withhelding Biological replicate 2
			SRX3680593	0 days after water withhelding Biological replicate 3
			SRX3680592	2 days after water withhelding Biological replicate 1
			SRX3680587	2 days after water withhelding Biological replicate 2
			SRX3680586	2 days after water withhelding Biological replicate 3
			SRX3680589	4 days after water withhelding Biological replicate 1
			SRX3680588	4 days after water withhelding Biological replicate 2
			SRX3680596	4 days after water withhelding Biological replicate 3
			SRX3680595	8 days after water withhelding Biological replicate 1
			SRX3680597	8 days after water withhelding Biological replicate 2
			SRX3680590	8 days after water withhelding Biological replicate 3
7	Vitis vinifera cv. Red globe	Leaves of well grown potted plants	SRX3753068	Control Biological replicate 1 (24 °C)	Physiological change and transcriptome analysis of Chinese wild Vitis amurensis and Vitis vinifera in response to cold stress. (Gu et al. 2020)
			SRX3753069	Control Biological replicate 2 (24 °C)
			SRX3753070	Control Biological replicate 3 (24 °C)
			SRX3753074	0 °C treatment for 3h Biological replicate 1
			SRX3753075	0 °C treatment for 3h Biological replicate 2
			SRX3753066	0 °C treatment for 3h Biological replicate 3
			SRX3753056	0 °C treatment for 12h Biological replicate 1
			SRX3753057	0 °C treatment for 12h Biological replicate 2
			SRX3753062	0 °C treatment for 12h Biological replicate 3
			SRX3753064	0 °C treatment for 48h Biological replicate 1
			SRX3753065	0 °C treatment for 48h Biological replicate 2
			SRX3753055	0 °C treatment for 48h Biological replicate 3
			SRX3753051	0 °C treatment for 72h Biological replicate 1
			SRX3753050	0 °C treatment for 72h Biological replicate 2
			SRX3753049	0 °C treatment for 72h Biological replicate 3
8	Vitis vinifera L. microvine	Deseeded berries	SRX103014	5-6 wpf (week post anthesis/flowering) berries at 16 °C (replicate 1)	Submitted by :Plant Industry, CSIRO, Mark Thomas; 2011-10-25 under project (Heat stress effects on gene expression in the grape berry. Comparison of pre- and post-véraison berries and microarray versus mRNA-seq datasets.)
			SRX103015	5-6 wpf berries at 16 °C (replicate 2)
			SRX103018	12-14 wpf berries at 16 °C (replicate 1)
			SRX103019	12-14 wpf berries at 16 °C (replicate 2)
			SRX103016	5-6 wpf berries at 38 °C (replicate 1)
			SRX103017	5-6 wpf berries at 38 °C (replicate 2)
			SRX103020	12-14 wpf berries treated at 38 °C for 1 hour (replicate 1)
			SRX103021	12-14 wpf berries treated at 38 °C for 1 hour (replicate 2)
