# Supplementary material for: Genome-Wide Identification of BTB Domain-Containing Gene Family in Grapevine (Vitis vinifera L.)
Source: MDPI journal article supplement (doi:10.3390/agriculture13020252), 2023-01-20
Supplement: s1 [file s1 › Table S2.xlsx]

## Sheet: Table S2
Table S2 Detailed information of conserved motifs identified in BTB gene family using MEME server
Motif No.	Sequence width	Protein sequence	Interproscan analysis of motif sequence
1	77	FISLAEALPDYARPVHDGLYRAIDIYLKAHPWLSESERKKJCRLMDCQKLSLEACMHAAQNERLPLRVVVQVLFFEQ	NPH3/RPT2-like
2	96	DIPGGPEAFELAAKFCYGVTVEJTAYNVAALRCAAEYLEMTEDYEEGNLIYKTEVFLNSVVLKSWKDSIIVLQSCESLLPWAEELKIVSRCIDSIA	NPH3/RPT2-like
3	200	TETVNGSHKFVIQGYSLAKGMGVGKYIASDTFTVGGYQWAIYFYPDGKNPEDNSTYVSVFIALASEGTDVRALFELTLLDQSGKGKHKVHSHFDRSLESGPYTLKYRGSMWGYKRFFRRTALETSDFLKDDCLKIHCTVGVVRSAIEGPKJYSIQVPPSDIGQHFGQLLESGEGSDVNFEVAGETFHAHKLVLAARSPVF	BTB/POZ and MATH domain-containing protein
4	55	LLPSZKGAVSCSFLLGLLRTAIILGASPACREELERRIGLQLDQATLDDLLIPSY	NPH3/RPT2-like
5	39	SDVTIEVGGGSFYLHKFPLASRSGFFKKLLEESSEESLS	BTB/POZ
6	36	TSLLKVAKLVDGYLAEVAPDPNLKLSK	NPH3
7	199	RINASEEAALMELLNFMYSNTLSTSTAPGLLDVLMAADKFEVASCMRHCSRLLRNLPMTPESALLYLELPSSVLMAEAVQPLTDAAKQYLAGRYKDVTKFQEEVMALPLAGIEAVLSSDDLQVASEDAVYDFVLKWARAQYPKLEERREILGTRLGRFIRFPYMTCRKLKKVLTCNDFDHDLASKVVLEALFFKAEAPY	BTB/POZ domain-containing protein POB1-like
8	28	DWWFEDLSVLSJDLYKRVITAMKSRGMK	NPH3
9	156	QIARZADNLHWJLDILIDRQIAEDFVKMWASQKELAVLHSKIPVVYRHEVSRITARLFIGIGRGQLLVSKDARLLLLQTWLEPLYDDFGWLRRACKGLDRKLVEDGLGQTILTLPLPHQQAILLAWFDRFLKAGDDCPNJQRAFEVWWRRAFIRRY	BTB/POZ domain-containing protein
10	60	SETMAQHLLAAADKYGLDRLKLLCESKLCKDISVNTVATTLALAEQHHAMQLKAVCLKFI	BTB/POZ and MATH domain-containing protein
11	55	ANYLBIKGLIDLTCQKVADMIKGKTPEEIRETFNIENDFTPEEEEEIRKENAWAF	S-phase kinase-associated protein 1
12	39	GWASVRRENQDLKLELDRMRSRVSELEKECLKMKQEIEK	None
13	25	YSGETLYDVDCVQRILEHFLLQEQS	NPH3
14	152	FVERAYKYRPVKVVEFELPRQQCVVYLDLKREECJNLFPAGRVYSQAFHLGGQGFFLSAHCNMDQQSSFHCFGLFLGMQEKGSVTFAVDYEFAARSKPTEEYISKYKGNYTFTGGKAVGYRNLFGIPWNAFMAEDSHYFINGILHLRAELTI	BTB/POZ domain-containing protein POB1-like
15	20	IPIIDVDPEAFEALLRFLYS	None
16	200	AFKNDENKNQIVECNALPMLILMLRSEDAGIHYEAIGVIGNLVHSSPNIKKEVLFAGALQPVIELLRSCCSESQREAALLLGQFAAADSDCKVHIVQRGAVRPLIEMLQSPDVQLREMSAFALGRLAQDHHNQAGIAHNGGLVPLLKLLDSKNGSLQHNAAFALYGLADNEDNVADFIKVGGVQKLQEGEFNVQPTKDCV	ABAP1/ARIA
17	25	PEVIGESLMYYAKKYLPGLSKQQSG	None
18	39	VSRALGILKVAAAJGFEAGVLSCLEYLEAVPWSEEEEEK	BTB/POZ domain-containing protein
19	199	KRLCEHHLEQGWLTPENLIDVFQLARKCDAPRLSLICHRMILKDFKAIANNZGWKVMKKVDPILEKEJLEAVVEADSRKEZRLKKJEEKKIYLZLHEAMEALLHICRDGCRTIGPRDKILKEDQVPCGFPACKGLELLVRHFAGCKLRVPGGCVHCKRMWQLLELHSRLCAEPDCCKVPLCRNFKEKIKKQSKKDEMKW	BT1/2/3/4/5
20	20	MKFMKLGSKPDAFQTDGNTV	None
