# Supplementary material for: Genome-Wide Identification of BTB Domain-Containing Gene Family in Grapevine (Vitis vinifera L.)
Source: MDPI journal article supplement (doi:10.3390/agriculture13020252), 2023-01-20
Supplement: s1 [file s1 › Table S3.pdf]

**Table S3-** Detailed information on the domains identified in the BTB proteins. Different colours represent BTB domain with different extensions.

| SR. NO. | DOMAIN SYMBOL                                                                       | DOMAIN EXTENSION       |
|---------|-------------------------------------------------------------------------------------|------------------------|
| 1       | 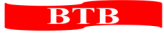   | BTB_POZ_NPY3-like      |
| 2       | 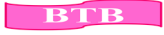   | BTB_POZ_BT             |
| 3       | 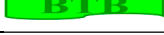   | BTB_POZ_NPR_plant      |
| 4       | 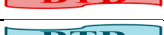   | BTB                    |
| 5       | 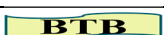   | BTB_POZ_BPM_plant      |
| 6       | 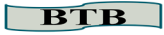   | BTB_POZ_ZBTB_KHLH-like |
| 7       | 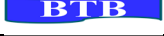   | BTB_POZ_ETO1-like      |
| 8       | 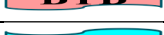   | BTB_POZ_CP190-like     |
| 9       | 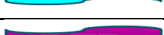   | BTB1_POZ_ABTB1_BPOZ1   |
| 10      | 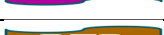   | BTB_POZ_BT             |
| 11      | 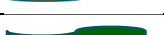  | BTB_POZ_KCTD-like      |
| 12      | 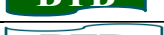 | BTB_POZ_FIP2-like      |
| 13      | 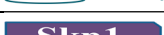 | BTB_POZ_ARIA_Plant     |
| 14      | 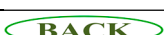 | BTB_POZ_Skp1           |
| 15      | 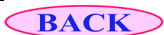 | Skp1_POZ               |
| 16      | 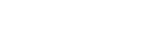 | BACK_BTBD17            |
| 17      |  | BACK_ARIA-like         |
