# Supplementary figures and images for: Genome-Wide Identification of BTB Domain-Containing Gene Family in Grapevine (Vitis vinifera L.)
Source: MDPI journal article supplement (doi:10.3390/agriculture13020252), 2023-01-20

**Figure S1**-Detailed domain analysis of total 69 BTB proteins in *V. vinifera*

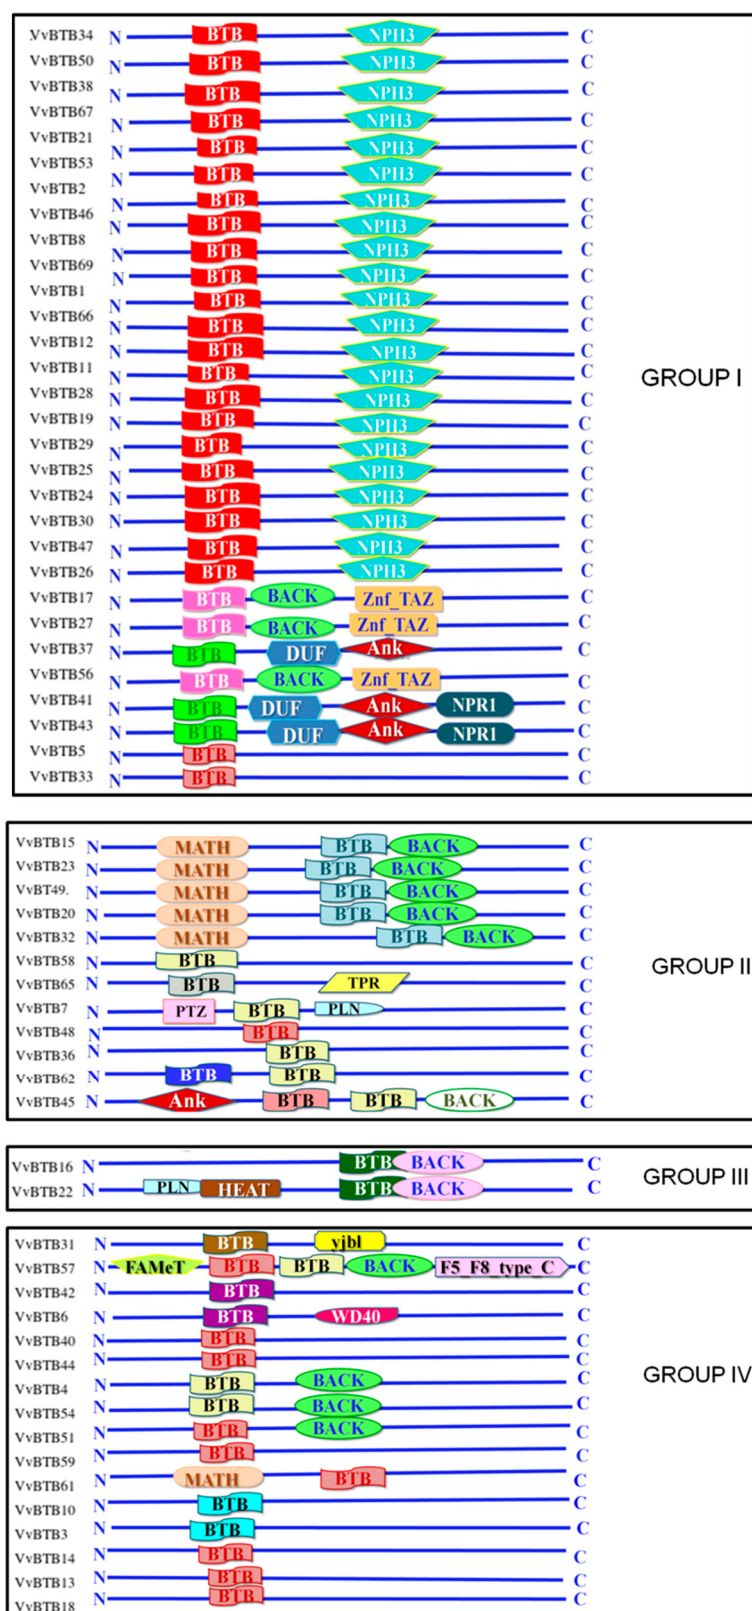

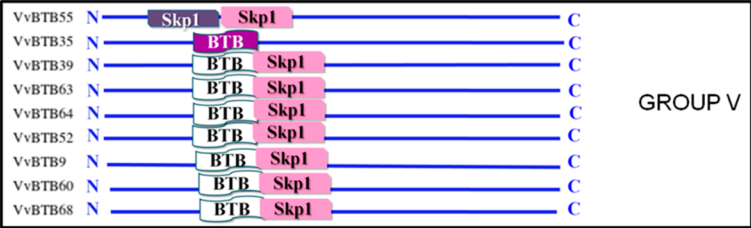

Supplement: s1 [file s1 › Figure S1.pdf]
